# Supplementary material for: A Multi-Faceted Approach to Analyse the Effects of Environmental Variables on Geographic Range and Genetic Structure of a Perennial Psammophilous Geophyte: The Case of the Sea Daffodil Pancratium maritimum L. in the Mediterranean Basin
Source: PLoS One. 2016 Oct 17;11(10):e0164816. doi: 10.1371/journal.pone.0164816 (PMC5066950; doi:10.1371/journal.pone.0164816)
Supplement: S2 File — Sheet 1: Dataset of the Pancratium maritimum accessions that were used in both the Species Distribution Models (SDMs) and the genetic analyses. Sheet 2: Relative contribution to the models and related response curves of each environmental predictor. (XLS) [file pone.0164816.s002.xls]

## Sheet: Sheet 1
Title: A multi-faceted approach to analyse the effects of environmental variables on geographic range and genetic structure of a perennial psammophilous geophyte: the case of the sea daffodil Pancratium maritimum L. in the Mediterranean basin.
Authors: O. De Castro, A. Di Maio, M. Di Febbraro, G. Imparato, M. Innangi, E. Vela, B. Menale
S2 File. Sheet 1: Data set of Pancratium maritimum accessions used both in the species distribution model and the genetic analyses.
Populations used for SSR analyses are in yellow
Nation	Location	Source	X	Y	SSR code	X arr	Y arr
ALGERIA	La Marsadelle	Tournebize R per. comm.	7.255132	37.014677		7.255	37.015
ALGERIA	Annaba	De Bélair G pers. comm.	8.12916667	36.90666667	AE	8.129	36.907
ALGERIA	Mazafran (Zeralda)	Benhouhou S pers. comm.	2.80362500	36.69871944	AL	2.804	36.699
ALGERIA	Bousfer (Oran)	Véla E pers. comm.	-0.82944444	35.75111111	AG	-0.829	35.751
BULGARIA	Kavatsite Camping	Berkov S, Evstatieva L, Popov S. Alkaloids in Bulgarian Pancratium maritimum L. Verlag der Zeitschrift für Naturforschung, Tübingen 2004.	27.70660405	42.39474427		27.707	42.395
BULGARIA	Arkutino	Herbarium PAL	27.73384605	42.33155628		27.734	42.332
CROATIA	Rijeka	Flora Croatica Database (hirc.botanic.hr/fcd/)	14.460545	45.320374		14.461	45.32
CROATIA	Ras	Flora Croatica Database (hirc.botanic.hr/fcd/)	14.701698	44.812279		14.702	44.812
CROATIA	Dundo	Flora Croatica Database (hirc.botanic.hr/fcd/)	14.690229	44.766652		14.69	44.767
CROATIA	Vis	Bogdanovic S pers. comm.	16.19016698	43.06869685	IV	16.19	43.069
CROATIA	Stoncica	Flora Croatica Database (hirc.botanic.hr/fcd/)	16.241947	43.064553		16.242	43.065
CROATIA	Resevo	Flora Croatica Database (hirc.botanic.hr/fcd/)	16.004682	42.982994		16.005	42.983
CROATIA	Orebic	Flora Croatica Database (hirc.botanic.hr/fcd/)	17.190611	42.977580		17.191	42.978
CROATIA	Korcula	Imparato G pers. comm.	17.08382214	42.91581580	CA	17.084	42.916
CROATIA	Peljesac	Flora Croatica Database (hirc.botanic.hr/fcd/)	17.754597	42.773928		17.755	42.774
CROATIA	Jakljan	Flora Croatica Database (hirc.botanic.hr/fcd/)	17.830000	42.737360		17.83	42.737
CROATIA	Mljet	Tournebize R per. comm.	17.740223	42.699793		17.74	42.7
CROATIA	Pelagosa	Flora Croatica Database (hirc.botanic.hr/fcd/)	16.259108	42.391907		16.259	42.392
CYPRUS	Alakati Turtle Beach	GBIF (www.gbif.org)	33.48907000	35.33459000		33.489	35.335
CYPRUS	Paphos	Herbarium RBGE	32.30782500	34.95670556		32.308	34.957
EGYPT	Alexandria	El-Hadidy A, Abd El-Ghani M, Amer W, Hassan R. Systematic revision of the genus Pancratium L. (Amaryllidaceae) in Egypt with a new addition. Notulae Scientia Biologicae 2011; 3: 24–38.	-8.44917000	37.08778000		-8.449	37.088
EGYPT	Sidi Barani	El-Hadidy A, Abd El-Ghani M, Amer W, Hassan R. Systematic revision of the genus Pancratium L. (Amaryllidaceae) in Egypt with a new addition. Notulae Scientia Biologicae 2011; 3: 24–38.	25.91373549	31.62356801		25.914	31.624
EGYPT	Baltim	Mashaly I A, El-Habashy IE, El-Halawany EF, Omar G. Habitats and Plant Communities in the Nile Delta of Egypt II. Irrigation and Drainage Canal Bank Habitat. Pakistan Journal of BiologicalSciences 2009; 12: 885-895.	31.12664270	31.59724031		31.127	31.597
EGYPT	Sallum	El-Hadidy A, Abd El-Ghani M, Amer W, Hassan R. Systematic revision of the genus Pancratium L. (Amaryllidaceae) in Egypt with a new addition. Notulae Scientia Biologicae 2011; 3: 24–38.	25.16435138	31.56946722		25.164	31.569
EGYPT	Bagbag	El-Hadidy A, Abd El-Ghani M, Amer W, Hassan R. Systematic revision of the genus Pancratium L. (Amaryllidaceae) in Egypt with a new addition. Notulae Scientia Biologicae 2011; 3: 24–38.	25.46846907	31.51069950		25.468	31.511
EGYPT	Bir Saida	El-Hadidy A, Abd El-Ghani M, Amer W, Hassan R. Systematic revision of the genus Pancratium L. (Amaryllidaceae) in Egypt with a new addition. Notulae Scientia Biologicae 2011; 3: 24–38.	25.30992349	31.50266850		25.31	31.503
EGYPT	Bir Abu Zelt	El-Hadidy A, Abd El-Ghani M, Amer W, Hassan R. Systematic revision of the genus Pancratium L. (Amaryllidaceae) in Egypt with a new addition. Notulae Scientia Biologicae 2011; 3: 24–38.	26.61531339	31.48885619		26.615	31.489
EGYPT	Bir Sabih	El-Hadidy A, Abd El-Ghani M, Amer W, Hassan R. Systematic revision of the genus Pancratium L. (Amaryllidaceae) in Egypt with a new addition. Notulae Scientia Biologicae 2011; 3: 24–38.	26.86755165	31.43762045		26.868	31.438
EGYPT	Ras Abu lau	El-Hadidy A, Abd El-Ghani M, Amer W, Hassan R. Systematic revision of the genus Pancratium L. (Amaryllidaceae) in Egypt with a new addition. Notulae Scientia Biologicae 2011; 3: 24–38.	27.05677478	31.39572655		27.057	31.396
EGYPT	El Qasr	El-Hadidy A, Abd El-Ghani M, Amer W, Hassan R. Systematic revision of the genus Pancratium L. (Amaryllidaceae) in Egypt with a new addition. Notulae Scientia Biologicae 2011; 3: 24–38.	27.13106898	31.37036776		27.131	31.37
EGYPT	Ras Alem El Rom	El-Hadidy A, Abd El-Ghani M, Amer W, Hassan R. Systematic revision of the genus Pancratium L. (Amaryllidaceae) in Egypt with a new addition. Notulae Scientia Biologicae 2011; 3: 24–38.	27.34156670	31.36831165		27.342	31.368
EGYPT	Marsa Matruh	Soltan MM, Hamed AR, Hetta MH, Hussein AA. Egyptian Pancratium maritimum L. flowers as a source of anti-Alzheimer’s agents. Bulletin of Faculty of Pharmacy, Cairo University 2015; 53(1): 19-22	27.25602187	31.36447004		27.256	31.364
EGYPT	Abukir	El-Hadidy A, Abd El-Ghani M, Amer W, Hassan R. Systematic revision of the genus Pancratium L. (Amaryllidaceae) in Egypt with a new addition. Notulae Scientia Biologicae 2011; 3: 24–38.	30.04669904	31.30596339		30.047	31.306
EGYPT	Abu Shaifa Gulf	El-Hadidy A, Abd El-Ghani M, Amer W, Hassan R. Systematic revision of the genus Pancratium L. (Amaryllidaceae) in Egypt with a new addition. Notulae Scientia Biologicae 2011; 3: 24–38.	27.41165173	31.23462255		27.412	31.235
EGYPT	Ras El Hekma	El-Hadidy A, Abd El-Ghani M, Amer W, Hassan R. Systematic revision of the genus Pancratium L. (Amaryllidaceae) in Egypt with a new addition. Notulae Scientia Biologicae 2011; 3: 24–38.	27.84369995	31.22491611		27.844	31.225
EGYPT	Ras El Hekma III	El-Hadidy A, Abd El-Ghani M, Amer W, Hassan R. Systematic revision of the genus Pancratium L. (Amaryllidaceae) in Egypt with a new addition. Notulae Scientia Biologicae 2011; 3: 24–38.	27.56363954	31.19247118		27.564	31.192
EGYPT	Ras El Hekma II	El-Hadidy A, Abd El-Ghani M, Amer W, Hassan R. Systematic revision of the genus Pancratium L. (Amaryllidaceae) in Egypt with a new addition. Notulae Scientia Biologicae 2011; 3: 24–38.	27.65460513	31.17734585		27.655	31.177
EGYPT	Gulf of Kanaies	El-Hadidy A, Abd El-Ghani M, Amer W, Hassan R. Systematic revision of the genus Pancratium L. (Amaryllidaceae) in Egypt with a new addition. Notulae Scientia Biologicae 2011; 3: 24–38.	27.91612380	31.10004763		27.916	31.1
EGYPT	Abu Gereb	El-Hadidy A, Abd El-Ghani M, Amer W, Hassan R. Systematic revision of the genus Pancratium L. (Amaryllidaceae) in Egypt with a new addition. Notulae Scientia Biologicae 2011; 3: 24–38.	28.09918142	31.08451067		28.099	31.085
EGYPT	Abu Sambra	El-Hadidy A, Abd El-Ghani M, Amer W, Hassan R. Systematic revision of the genus Pancratium L. (Amaryllidaceae) in Egypt with a new addition. Notulae Scientia Biologicae 2011; 3: 24–38.	28.33884914	31.06536575		28.339	31.065
EGYPT	Ras el Dahaba	El-Hadidy A, Abd El-Ghani M, Amer W, Hassan R. Systematic revision of the genus Pancratium L. (Amaryllidaceae) in Egypt with a new addition. Notulae Scientia Biologicae 2011; 3: 24–38.	28.56622391	31.03866582		28.566	31.039
EGYPT	Amria	El-Hadidy A, Abd El-Ghani M, Amer W, Hassan R. Systematic revision of the genus Pancratium L. (Amaryllidaceae) in Egypt with a new addition. Notulae Scientia Biologicae 2011; 3: 24–38.	29.81326154	31.01558778		29.813	31.016
EGYPT	Abusir	El-Hadidy A, Abd El-Ghani M, Amer W, Hassan R. Systematic revision of the genus Pancratium L. (Amaryllidaceae) in Egypt with a new addition. Notulae Scientia Biologicae 2011; 3: 24–38.	29.51045227	30.95278648		29.51	30.953
EGYPT	Burg El Arab	El-Hadidy A, Abd El-Ghani M, Amer W, Hassan R. Systematic revision of the genus Pancratium L. (Amaryllidaceae) in Egypt with a new addition. Notulae Scientia Biologicae 2011; 3: 24–38.	29.48210109	30.93538739		29.482	30.935
EGYPT	Ras Gabisa	El-Hadidy A, Abd El-Ghani M, Amer W, Hassan R. Systematic revision of the genus Pancratium L. (Amaryllidaceae) in Egypt with a new addition. Notulae Scientia Biologicae 2011; 3: 24–38.	28.88620599	30.89224844		28.886	30.892
EGYPT	El Ameid	El-Hadidy A, Abd El-Ghani M, Amer W, Hassan R. Systematic revision of the genus Pancratium L. (Amaryllidaceae) in Egypt with a new addition. Notulae Scientia Biologicae 2011; 3: 24–38.	29.19509379	30.82845934		29.195	30.828
FRANCE	Ile Hoëdic	Grassi F, Cazzaniga E, Minuto L, Peccennini S, Barberis G, Basso B. Evaluation of biodiversity and conservation strategies in Pancratium maritimum L. for the Northern Tyrrhenian Sea. Biodiversity and Conservation 2005; 14(9): 2159-2170	-2.87597748	47.33490507		-2.876	47.335
FRANCE	Huchet Plage	GBIF (www.gbif.org)	-1.38150000	43.88838000		-1.382	43.888
FRANCE	Le Grand Travers	GBIF (www.gbif.org)	4.05955554	43.55783093		4.06	43.558
FRANCE	Le Petit Travers	GBIF (www.gbif.org)	4.01994000	43.55490000		4.02	43.555
FRANCE	Plage de Villeroy	GBIF (www.gbif.org)	3.63742000	43.38044000		3.637	43.38
FRANCE	Dune des 3 digues	GBIF (www.gbif.org)	3.61439000	43.36488000		3.614	43.365
FRANCE	Marseillan	Véla E pers. comm.	3.56305556	43.32388889	M	3.563	43.324
FRANCE	Calanque de Marseilleveyre	GBIF (www.gbif.org)	5.37104341	43.24444201		5.371	43.244
FRANCE	Pampelonne	GBIF (www.gbif.org)	6.66174000	43.21967000		6.662	43.22
FRANCE	Cabanes de Fleury	GBIF (www.gbif.org)	3.23544000	43.21108000		3.235	43.211
FRANCE	Hyères	Grassi F, Cazzaniga E, Minuto L, Peccennini S, Barberis G, Basso B. Evaluation of biodiversity and conservation strategies in Pancratium maritimum L. for the Northern Tyrrhenian Sea. Biodiversity and Conservation 2005; 14(9): 2159-2169	6.17427874	43.10156905		6.174	43.102
FRANCE	Giens	GBIF (www.gbif.org)	6.13160000	43.06170000		6.132	43.062
FRANCE	Salines de Port la Nouvelle	GBIF (www.gbif.org)	3.07652000	43.05425000		3.077	43.054
FRANCE	Barcaggio	Tela Botanica (www.tela-botanica.org)	9.415860	43.008640		9.416	43.009
FRANCE	Chemin des Vignes	GBIF (www.gbif.org)	3.04949634	42.99023008		3.049	42.99
FRANCE	Plage de la Franqui	Herbarium PAL	3.03779427	42.93583004		3.038	42.936
FRANCE	Ostriconi	GBIF (www.gbif.org)	9.06111000	42.66135000		9.061	42.661
FRANCE	Etang de Crovani	Herbarium G	8.68017338	42.46792556		8.68	42.468
FRANCE	San Nicolao	CONS. BOT. NAT. Corse	9.534	42.3742	CO	9.534	42.374
FRANCE	Plage de Chiuni	GBIF (www.gbif.org)	8.58925000	42.17154000		8.589	42.172
FRANCE	Aleria	Tela Botanica (www.tela-botanica.org)	9.555490	42.135880		9.555	42.136
FRANCE	Liamone	GBIF (www.gbif.org)	8.71971000	42.07603000		8.72	42.076
FRANCE	Ajaccio Cors.	CONS. BOT. NAT. Corse	8.62387222	41.93474167	CJ	8.624	41.935
FRANCE	SW Corsica, Ajaccio	Perrone R, Salmeri C, Brullo S, Colombo P, De Castro O. What do leaf anatomy and micro-morphology tell us about the psammophilous Pancratium maritimum L. (Amaryllidaceae) in response to sand dune conditions? Flora - Morphology, Distribution, Functional Ecology of Plants 2015; 213; 20-31	8.70403658	41.90752451		8.704	41.908
FRANCE	Favone	Herbarium G	9.39668807	41.78354159		9.397	41.784
FRANCE	Propiano Cors.	CONS. BOT. NAT. Corse	8.89295278	41.67429167	CS	8.893	41.674
FRANCE	Porto Vecchio Cors.	CONS. BOT. NAT. Corse	9.37537778	41.67061389	CC	9.375	41.671
FRANCE	Plage de Tizzano	GBIF (www.gbif.org)	8.85640291	41.53537455		8.856	41.535
FRANCE	Golfo di Porto Novo	Herbarium G	9.26850121	41.49930859		9.269	41.499
FRANCE	Anse de Rondinara	GBIF (www.gbif.org)	9.26978000	41.46678000		9.27	41.467
FRANCE	Ventilegne	Herbarium G	9.12239588	41.44165796		9.122	41.442
FRANCE	Ile Lavezzi	GBIF (www.gbif.org)	9.25225193	41.34315065		9.252	41.343
FRANCE	Sant'Amanza	Herbarium G	9.18794319	41.24512933		9.188	41.245
FRANCE	Spargi	GBIF (www.gbif.org)	9.34253700	41.23117200		9.343	41.231
GREECE	Santa Maria	Nikopoulos D, Nikopoulou D, Papadopoulou K, Alexopoulos A. Pancratium maritimumEcosystems in Greece. Sustainable Management and Development of Mountainous and Island Areas 2006; 1: 333-407	9.21910001	41.40555854		9.219	41.406
GREECE	Myrodato	Nikopoulos D, Nikopoulou D, Papadopoulou K, Alexopoulos A. Pancratium maritimumEcosystems in Greece. Sustainable Management and Development of Mountainous and Island Areas 2006; 1: 333-392	24.94275405	40.92989507		24.943	40.93
GREECE	Pontolivadon	GBIF (www.gbif.org)	24.57435784	40.91836582		24.574	40.918
GREECE	Tarti	Nikopoulos D, Nikopoulou D, Papadopoulou K, Alexopoulos A. Pancratium maritimumEcosystems in Greece. Sustainable Management and Development of Mountainous and Island Areas 2006; 1: 333-416	9.67741256	40.89214844		9.677	40.892
GREECE	Nestos	Nikopoulos D, Nikopoulou D, Papadopoulou K, Alexopoulos A. Pancratium maritimumEcosystems in Greece. Sustainable Management and Development of Mountainous and Island Areas 2006; 1: 333-393	24.81459700	40.85869210		24.815	40.859
GREECE	Plaka	GBIF (www.gbif.org)	22.56712196	40.08323044		22.567	40.083
GREECE	Azapiko	Nikopoulos D, Nikopoulou D, Papadopoulou K, Alexopoulos A. Pancratium maritimumEcosystems in Greece. Sustainable Management and Development of Mountainous and Island Areas 2006; 1: 333-357	23.83402690	40.02381510		23.834	40.024
GREECE	Saravari	Nikopoulos D, Nikopoulou D, Papadopoulou K, Alexopoulos A. Pancratium maritimumEcosystems in Greece. Sustainable Management and Development of Mountainous and Island Areas 2006; 1: 333-409	25.34714815	39.96567005		25.347	39.966
GREECE	Kalliopi	Nikopoulos D, Nikopoulou D, Papadopoulou K, Alexopoulos A. Pancratium maritimumEcosystems in Greece. Sustainable Management and Development of Mountainous and Island Areas 2006; 1: 333-380	25.35721931	39.90859068		25.357	39.909
GREECE	Portiano	Nikopoulos D, Nikopoulou D, Papadopoulou K, Alexopoulos A. Pancratium maritimumEcosystems in Greece. Sustainable Management and Development of Mountainous and Island Areas 2006; 1: 333-403	25.19296608	39.88449606		25.193	39.884
GREECE	Fanaraki	Nikopoulos D, Nikopoulou D, Papadopoulou K, Alexopoulos A. Pancratium maritimumEcosystems in Greece. Sustainable Management and Development of Mountainous and Island Areas 2006; 1: 333-365	25.23876631	39.85458732		25.239	39.855
GREECE	Skandali	Nikopoulos D, Nikopoulou D, Papadopoulou K, Alexopoulos A. Pancratium maritimumEcosystems in Greece. Sustainable Management and Development of Mountainous and Island Areas 2006; 1: 333-413	25.34941883	39.79779886		25.349	39.798
GREECE	Gilfada	Nikopoulos D, Nikopoulou D, Papadopoulou K, Alexopoulos A. Pancratium maritimumEcosystems in Greece. Sustainable Management and Development of Mountainous and Island Areas 2006; 1: 333-373	19.81075490	39.59049762		19.811	39.59
GREECE	Limnothalassa Korision	Nikopoulos D, Nikopoulou D, Papadopoulou K, Alexopoulos A. Pancratium maritimumEcosystems in Greece. Sustainable Management and Development of Mountainous and Island Areas 2006; 1: 333-389	19.92556687	39.43224379		19.926	39.432
GREECE	Koukoynaries	Nikopoulos D, Nikopoulou D, Papadopoulou K, Alexopoulos A. Pancratium maritimumEcosystems in Greece. Sustainable Management and Development of Mountainous and Island Areas 2006; 1: 333-384	23.40462971	39.14918907		23.405	39.149
GREECE	Arminopetra	Nikopoulos D, Nikopoulou D, Papadopoulou K, Alexopoulos A. Pancratium maritimumEcosystems in Greece. Sustainable Management and Development of Mountainous and Island Areas 2006; 1: 333-355	23.62665706	39.14603741		23.627	39.146
GREECE	Skala Eresou	Nikopoulos D, Nikopoulou D, Papadopoulou K, Alexopoulos A. Pancratium maritimumEcosystems in Greece. Sustainable Management and Development of Mountainous and Island Areas 2006; 1: 333-412	25.92893589	39.13529937		25.929	39.135
GREECE	Vatera	Nikopoulos D, Nikopoulou D, Papadopoulou K, Alexopoulos A. Pancratium maritimumEcosystems in Greece. Sustainable Management and Development of Mountainous and Island Areas 2006; 1: 333-422	26.20087437	39.01927629		26.201	39.019
GREECE	Skiros (Airport)	GBIF (www.gbif.org)	24.48194248	38.97571213		24.482	38.976
GREECE	Skyros (Akhili Bay)	Perrone R, Salmeri C, Brullo S, Colombo P, De Castro O. What do leaf anatomy and micro-morphology tell us about the psammophilous Pancratium maritimum L. (Amaryllidaceae) in response to sand dune conditions? Flora - Morphology, Distribution, Functional Ecology of Plants 2015; 213; 20-31	24.57797737	38.86808700		24.578	38.868
GREECE	Skiros	Brullo S pers. comm.	24.56081111	38.84327778		24.561	38.843
GREECE	Gyra	Nikopoulos D, Nikopoulou D, Papadopoulou K, Alexopoulos A. Pancratium maritimumEcosystems in Greece. Sustainable Management and Development of Mountainous and Island Areas 2006; 1: 333-375	20.67934512	38.83680590		20.679	38.837
GREECE	Limnos	Nikopoulos D, Nikopoulou D, Papadopoulou K, Alexopoulos A. Pancratium maritimumEcosystems in Greece. Sustainable Management and Development of Mountainous and Island Areas 2006; 1: 333-388	25.58186493	38.53989330		25.582	38.54
GREECE	Chios	Brullo S pers. comm.	25.99053058	38.39159442		25.991	38.392
GREECE	Karfas	GBIF (www.gbif.org)	26.15386707	38.31900410		26.154	38.319
GREECE	Avlonia	Nikopoulos D, Nikopoulou D, Papadopoulou K, Alexopoulos A. Pancratium maritimumEcosystems in Greece. Sustainable Management and Development of Mountainous and Island Areas 2006; 1: 333-356	25.89440993	38.22404732		25.894	38.224
GREECE	Agia Dynami	Nikopoulos D, Nikopoulou D, Papadopoulou K, Alexopoulos A. Pancratium maritimumEcosystems in Greece. Sustainable Management and Development of Mountainous and Island Areas 2006; 1: 333-342	25.91372720	38.21458946		25.914	38.215
GREECE	Kalogria	Imparato G pers. comm.	21.36557222	38.16123611	GA	21.366	38.161
GREECE	Minies	Nikopoulos D, Nikopoulou D, Papadopoulou K, Alexopoulos A. Pancratium maritimumEcosystems in Greece. Sustainable Management and Development of Mountainous and Island Areas 2006; 1: 333-391	20.49577139	38.13347530		20.496	38.133
GREECE	Kyllini	Nikopoulos D, Nikopoulou D, Papadopoulou K, Alexopoulos A. Pancratium maritimumEcosystems in Greece. Sustainable Management and Development of Mountainous and Island Areas 2006; 1: 333-386	21.14460643	37.93796251		21.145	37.938
GREECE	Phalerum	GBIF (www.gbif.org)	23.69555558	37.92148032		23.696	37.921
GREECE	Agios Petros	Nikopoulos D, Nikopoulou D, Papadopoulou K, Alexopoulos A. Pancratium maritimumEcosystems in Greece. Sustainable Management and Development of Mountainous and Island Areas 2006; 1: 333-349	24.75297074	37.87894346		24.753	37.879
GREECE	Aginara	Sibilio G pers. comm.	21.10880157	37.85925435		21.109	37.859
GREECE	Arkoudi	Nikopoulos D, Nikopoulou D, Papadopoulou K, Alexopoulos A. Pancratium maritimumEcosystems in Greece. Sustainable Management and Development of Mountainous and Island Areas 2006; 1: 333-354	21.11176213	37.84208763		21.112	37.842
GREECE	Alikanas	Nikopoulos D, Nikopoulou D, Papadopoulou K, Alexopoulos A. Pancratium maritimumEcosystems in Greece. Sustainable Management and Development of Mountainous and Island Areas 2006; 1: 333-352	20.78026944	37.84120889		20.78	37.841
GREECE	Thines	Nikopoulos D, Nikopoulou D, Papadopoulou K, Alexopoulos A. Pancratium maritimumEcosystems in Greece. Sustainable Management and Development of Mountainous and Island Areas 2006; 1: 333-417	21.19692014	37.82057313		21.197	37.821
GREECE	Kalamaki II (Crete)	Nikopoulos D, Nikopoulou D, Papadopoulou K, Alexopoulos A. Pancratium maritimumEcosystems in Greece. Sustainable Management and Development of Mountainous and Island Areas 2006; 1: 333-378	20.89179394	37.73437476		20.892	37.734
GREECE	Dafni	Ferraro S pers. comm.	20.95472778	37.72083056		20.955	37.721
GREECE	Cambos	Nikopoulos D, Nikopoulou D, Papadopoulou K, Alexopoulos A. Pancratium maritimumEcosystems in Greece. Sustainable Management and Development of Mountainous and Island Areas 2006; 1: 333-360	26.67314736	37.70783477		26.673	37.708
GREECE	Psyli Ammos	Nikopoulos D, Nikopoulou D, Papadopoulou K, Alexopoulos A. Pancratium maritimumEcosystems in Greece. Sustainable Management and Development of Mountainous and Island Areas 2006; 1: 333-405	27.01712931	37.70781934		27.017	37.708
GREECE	Gerakas	Nikopoulos D, Nikopoulou D, Papadopoulou K, Alexopoulos A. Pancratium maritimumEcosystems in Greece. Sustainable Management and Development of Mountainous and Island Areas 2006; 1: 333-371	20.98774266	37.70644479		20.988	37.706
GREECE	Potokaci	Nikopoulos D, Nikopoulou D, Papadopoulou K, Alexopoulos A. Pancratium maritimumEcosystems in Greece. Sustainable Management and Development of Mountainous and Island Areas 2006; 1: 333-404	26.92086692	37.68663383		26.921	37.687
GREECE	Otzias	Nikopoulos D, Nikopoulou D, Papadopoulou K, Alexopoulos A. Pancratium maritimumEcosystems in Greece. Sustainable Management and Development of Mountainous and Island Areas 2006; 1: 333-394	24.35073555	37.67458683		24.351	37.675
GREECE	Kavouri	Nikopoulos D, Nikopoulou D, Papadopoulou K, Alexopoulos A. Pancratium maritimumEcosystems in Greece. Sustainable Management and Development of Mountainous and Island Areas 2006; 1: 333-382	21.36324728	37.66159541		21.363	37.662
GREECE	Agios Georgios	Nikopoulos D, Nikopoulou D, Papadopoulou K, Alexopoulos A. Pancratium maritimumEcosystems in Greece. Sustainable Management and Development of Mountainous and Island Areas 2006; 1: 333-346	24.31571442	37.65808826		24.316	37.658
GREECE	Katakolo	Nikopoulos D, Nikopoulou D, Papadopoulou K, Alexopoulos A. Pancratium maritimumEcosystems in Greece. Sustainable Management and Development of Mountainous and Island Areas 2006; 1: 333-381	21.31729411	37.65080904		21.317	37.651
GREECE	Pyrgos	Nikopoulos D, Nikopoulou D, Papadopoulou K, Alexopoulos A. Pancratium maritimumEcosystems in Greece. Sustainable Management and Development of Mountainous and Island Areas 2006; 1: 333-406	21.41685266	37.63781717		21.417	37.638
GREECE	Agiou Romanou	Nikopoulos D, Nikopoulou D, Papadopoulou K, Alexopoulos A. Pancratium maritimumEcosystems in Greece. Sustainable Management and Development of Mountainous and Island Areas 2006; 1: 333-350	25.11287561	37.56970855		25.113	37.57
GREECE	Agios Ioannis	Nikopoulos D, Nikopoulou D, Papadopoulou K, Alexopoulos A. Pancratium maritimumEcosystems in Greece. Sustainable Management and Development of Mountainous and Island Areas 2006; 1: 333-347	25.22882399	37.54229835		25.229	37.542
GREECE	Kaiafas	Nikopoulos D, Nikopoulou D, Papadopoulou K, Alexopoulos A. Pancratium maritimumEcosystems in Greece. Sustainable Management and Development of Mountainous and Island Areas 2006; 1: 333-377	21.59445108	37.51235640		21.594	37.512
GREECE	Poros	Nikopoulos D, Nikopoulou D, Papadopoulou K, Alexopoulos A. Pancratium maritimumEcosystems in Greece. Sustainable Management and Development of Mountainous and Island Areas 2006; 1: 333-402	23.46985055	37.50828228		23.47	37.508
GREECE	Panormos	Nikopoulos D, Nikopoulou D, Papadopoulou K, Alexopoulos A. Pancratium maritimumEcosystems in Greece. Sustainable Management and Development of Mountainous and Island Areas 2006; 1: 333-397	25.36013301	37.47633976		25.36	37.476
GREECE	Ftelia	Nikopoulos D, Nikopoulou D, Papadopoulou K, Alexopoulos A. Pancratium maritimumEcosystems in Greece. Sustainable Management and Development of Mountainous and Island Areas 2006; 1: 333-369	25.37344687	37.46196718		25.373	37.462
GREECE	Paraga	Nikopoulos D, Nikopoulou D, Papadopoulou K, Alexopoulos A. Pancratium maritimumEcosystems in Greece. Sustainable Management and Development of Mountainous and Island Areas 2006; 1: 333-398	25.34938175	37.40788330		25.349	37.408
GREECE	Agathopes	Nikopoulos D, Nikopoulou D, Papadopoulou K, Alexopoulos A. Pancratium maritimumEcosystems in Greece. Sustainable Management and Development of Mountainous and Island Areas 2006; 1: 333-341	24.88070479	37.38595380		24.881	37.386
GREECE	Flampouria	Nikopoulos D, Nikopoulou D, Papadopoulou K, Alexopoulos A. Pancratium maritimumEcosystems in Greece. Sustainable Management and Development of Mountainous and Island Areas 2006; 1: 333-367	24.39977414	37.36378922		24.4	37.364
GREECE	Vagia	Nikopoulos D, Nikopoulou D, Papadopoulou K, Alexopoulos A. Pancratium maritimumEcosystems in Greece. Sustainable Management and Development of Mountainous and Island Areas 2006; 1: 333-421	24.46274970	37.12821847		24.463	37.128
GREECE	Stellida	Nikopoulos D, Nikopoulou D, Papadopoulou K, Alexopoulos A. Pancratium maritimumEcosystems in Greece. Sustainable Management and Development of Mountainous and Island Areas 2006; 1: 333-415	25.35095459	37.08857416		25.351	37.089
GREECE	Macheres	GBIF (www.gbif.org)	25.69496102	37.08790316		25.695	37.088
GREECE	Xrysi Akti	Nikopoulos D, Nikopoulou D, Papadopoulou K, Alexopoulos A. Pancratium maritimumEcosystems in Greece. Sustainable Management and Development of Mountainous and Island Areas 2006; 1: 333-424	25.24026558	37.01045761		25.24	37.01
GREECE	Petrochori	Nikopoulos D, Nikopoulou D, Papadopoulou K, Alexopoulos A. Pancratium maritimumEcosystems in Greece. Sustainable Management and Development of Mountainous and Island Areas 2006; 1: 333-400	21.65511614	36.97979908		21.655	36.98
GREECE	Sifnos	Brullo S pers. comm.	24.72839444	36.93085278		24.728	36.931
GREECE	Sifnos, Vathi	Perrone R, Salmeri C, Brullo S, Colombo P, De Castro O. What do leaf anatomy and micro-morphology tell us about the psammophilous Pancratium maritimum L. (Amaryllidaceae) in response to sand dune conditions? Flora - Morphology, Distribution, Functional Ecology of Plants 2015; 213; 20-31	24.69294300	36.93100500		24.693	36.931
GREECE	Tigaki	Nikopoulos D, Nikopoulou D, Papadopoulou K, Alexopoulos A. Pancratium maritimumEcosystems in Greece. Sustainable Management and Development of Mountainous and Island Areas 2006; 1: 333-418	27.18028759	36.89079792		27.18	36.891
GREECE	Mastichari	GBIF (www.gbif.org)	27.07316366	36.84716605		27.073	36.847
GREECE	Mikro Avelas	GBIF (www.gbif.org)	25.39545812	36.82716848		25.395	36.827
GREECE	Foinikounta	Nikopoulos D, Nikopoulou D, Papadopoulou K, Alexopoulos A. Pancratium maritimumEcosystems in Greece. Sustainable Management and Development of Mountainous and Island Areas 2006; 1: 333-368	21.80711934	36.80700861		21.807	36.807
GREECE	Skala	Nikopoulos D, Nikopoulou D, Papadopoulou K, Alexopoulos A. Pancratium maritimumEcosystems in Greece. Sustainable Management and Development of Mountainous and Island Areas 2006; 1: 333-411	22.66956081	36.80571754		22.67	36.806
GREECE	Elos	Nikopoulos D, Nikopoulou D, Papadopoulou K, Alexopoulos A. Pancratium maritimumEcosystems in Greece. Sustainable Management and Development of Mountainous and Island Areas 2006; 1: 333-361	22.69365404	36.80457261		22.694	36.805
GREECE	Gravousa	GBIF (www.gbif.org)	25.74639229	36.80243396		25.746	36.802
GREECE	Lambes	Nikopoulos D, Nikopoulou D, Papadopoulou K, Alexopoulos A. Pancratium maritimumEcosystems in Greece. Sustainable Management and Development of Mountainous and Island Areas 2006; 1: 333-387	21.74846133	36.79955989		21.748	36.8
GREECE	Bonatsas	Nikopoulos D, Nikopoulou D, Papadopoulou K, Alexopoulos A. Pancratium maritimumEcosystems in Greece. Sustainable Management and Development of Mountainous and Island Areas 2006; 1: 333-359	24.55037479	36.77617229		24.55	36.776
GREECE	Sarakiniko	Nikopoulos D, Nikopoulou D, Papadopoulou K, Alexopoulos A. Pancratium maritimumEcosystems in Greece. Sustainable Management and Development of Mountainous and Island Areas 2006; 1: 333-408	24.46316873	36.74221368		24.463	36.742
GREECE	Kalamo	Nikopoulos D, Nikopoulou D, Papadopoulou K, Alexopoulos A. Pancratium maritimumEcosystems in Greece. Sustainable Management and Development of Mountainous and Island Areas 2006; 1: 333-379	25.38565512	36.70411381		25.386	36.704
GREECE	Piltra	Nikopoulos D, Nikopoulou D, Papadopoulou K, Alexopoulos A. Pancratium maritimumEcosystems in Greece. Sustainable Management and Development of Mountainous and Island Areas 2006; 1: 333-401	22.83982441	36.68653204		22.84	36.687
GREECE	Maganari	Nikopoulos D, Nikopoulou D, Papadopoulou K, Alexopoulos A. Pancratium maritimumEcosystems in Greece. Sustainable Management and Development of Mountainous and Island Areas 2006; 1: 333-390	25.36986726	36.65981963		25.37	36.66
GREECE	Pali	Nikopoulos D, Nikopoulou D, Papadopoulou K, Alexopoulos A. Pancratium maritimumEcosystems in Greece. Sustainable Management and Development of Mountainous and Island Areas 2006; 1: 333-395	27.17222116	36.61839488		27.172	36.618
GREECE	Panagia	Nikopoulos D, Nikopoulou D, Papadopoulou K, Alexopoulos A. Pancratium maritimumEcosystems in Greece. Sustainable Management and Development of Mountainous and Island Areas 2006; 1: 333-396	23.13211587	36.54219613		23.132	36.542
GREECE	Simos	Nikopoulos D, Nikopoulou D, Papadopoulou K, Alexopoulos A. Pancratium maritimumEcosystems in Greece. Sustainable Management and Development of Mountainous and Island Areas 2006; 1: 333-410	22.97324402	36.47577422		22.973	36.476
GREECE	Rodi	Corsini-Foka M pers. comm.	28.21751111	36.45317500	H	28.218	36.453
GREECE	Maina	Pollio A pers. comm.	22.48576697	36.42836477		22.486	36.428
GREECE	Perissa	Nikopoulos D, Nikopoulou D, Papadopoulou K, Alexopoulos A. Pancratium maritimumEcosystems in Greece. Sustainable Management and Development of Mountainous and Island Areas 2006; 1: 333-399	25.47579772	36.35660841		25.476	36.357
GREECE	Faliraki	Nikopoulos D, Nikopoulou D, Papadopoulou K, Alexopoulos A. Pancratium maritimumEcosystems in Greece. Sustainable Management and Development of Mountainous and Island Areas 2006; 1: 333-364	28.20851322	36.33289849		28.209	36.333
GREECE	Aphadou	Nikopoulos D, Nikopoulou D, Papadopoulou K, Alexopoulos A. Pancratium maritimumEcosystems in Greece. Sustainable Management and Development of Mountainous and Island Areas 2006; 1: 333-353	28.18049444	36.29151494		28.18	36.292
GREECE	Tsambika-Kolimbia	Nikopoulos D, Nikopoulou D, Papadopoulou K, Alexopoulos A. Pancratium maritimumEcosystems in Greece. Sustainable Management and Development of Mountainous and Island Areas 2006; 1: 333-420	28.16438414	36.24662548		28.164	36.247
GREECE	Lardos	GBIF (www.gbif.org)	28.02039000	36.07666000		28.02	36.077
GREECE	Agria Grambousa	Nikopoulos D, Nikopoulou D, Papadopoulou K, Alexopoulos A. Pancratium maritimumEcosystems in Greece. Sustainable Management and Development of Mountainous and Island Areas 2006; 1: 333-351	23.58250444	35.64362029		23.583	35.644
GREECE	Karpathos	Herbarium PAL	27.06860086	35.59037629		27.069	35.59
GREECE	Kolimbari	Nikopoulos D, Nikopoulou D, Papadopoulou K, Alexopoulos A. Pancratium maritimumEcosystems in Greece. Sustainable Management and Development of Mountainous and Island Areas 2006; 1: 333-383	23.78425421	35.54189746		23.784	35.542
GREECE	Agia Marina	Nikopoulos D, Nikopoulou D, Papadopoulou K, Alexopoulos A. Pancratium maritimumEcosystems in Greece. Sustainable Management and Development of Mountainous and Island Areas 2006; 1: 333-345	23.93113506	35.52193021		23.931	35.522
GREECE	Gerani	Nikopoulos D, Nikopoulou D, Papadopoulou K, Alexopoulos A. Pancratium maritimumEcosystems in Greece. Sustainable Management and Development of Mountainous and Island Areas 2006; 1: 333-372	23.87850044	35.52197424		23.879	35.522
GREECE	Balos	Nikopoulos D, Nikopoulou D, Papadopoulou K, Alexopoulos A. Pancratium maritimumEcosystems in Greece. Sustainable Management and Development of Mountainous and Island Areas 2006; 1: 333-358	23.61194860	35.51977925		23.612	35.52
GREECE	Afoti	Nikopoulos D, Nikopoulou D, Papadopoulou K, Alexopoulos A. Pancratium maritimumEcosystems in Greece. Sustainable Management and Development of Mountainous and Island Areas 2006; 1: 333-340	27.20244569	35.51294038		27.202	35.513
GREECE	Falasarna	Nikopoulos D, Nikopoulou D, Papadopoulou K, Alexopoulos A. Pancratium maritimumEcosystems in Greece. Sustainable Management and Development of Mountainous and Island Areas 2006; 1: 333-363	23.58062918	35.49267738		23.581	35.493
GREECE	Stauromenos	Nikopoulos D, Nikopoulou D, Papadopoulou K, Alexopoulos A. Pancratium maritimumEcosystems in Greece. Sustainable Management and Development of Mountainous and Island Areas 2006; 1: 333-414	24.58275069	35.38229125		24.583	35.382
GREECE	Georgioupoli	GBIF (www.gbif.org)	24.27326000	35.35742000		24.273	35.357
GREECE	Episkopi	Nikopoulos D, Nikopoulou D, Papadopoulou K, Alexopoulos A. Pancratium maritimumEcosystems in Greece. Sustainable Management and Development of Mountainous and Island Areas 2006; 1: 333-362	24.34078927	35.35070426		24.341	35.351
GREECE	Chersonissos (Crete)	Kypriotakis Z pers. comm.	25.48249192	35.29537807	F	25.482	35.295
GREECE	Elafonissi (SW Crete)	Perrone R, Salmeri C, Brullo S, Colombo P, De Castro O. What do leaf anatomy and micro-morphology tell us about the psammophilous Pancratium maritimum L. (Amaryllidaceae) in response to sand dune conditions? Flora - Morphology, Distribution, Functional Ecology of Plants 2015; 213; 20-31	23.53179400	35.26915700		23.532	35.269
GREECE	Elafonisi (Crete)	Brullo S pers. comm.	23.56368655	35.26844290		23.564	35.268
GREECE	Pahia Ammos	Perrone R, Salmeri C, Brullo S, Colombo P, De Castro O. What do leaf anatomy and micro-morphology tell us about the psammophilous Pancratium maritimum L. (Amaryllidaceae) in response to sand dune conditions? Flora - Morphology, Distribution, Functional Ecology of Plants 2015; 213; 20-31	23.67835997	35.23239456		23.678	35.232
GREECE	Plakia (Crete)	Perrone R, Salmeri C, Brullo S, Colombo P, De Castro O. What do leaf anatomy and micro-morphology tell us about the psammophilous Pancratium maritimum L. (Amaryllidaceae) in response to sand dune conditions? Flora - Morphology, Distribution, Functional Ecology of Plants 2015; 213; 20-31	24.39969600	35.18519500		24.4	35.185
GREECE	Triopetra	Nikopoulos D, Nikopoulou D, Papadopoulou K, Alexopoulos A. Pancratium maritimumEcosystems in Greece. Sustainable Management and Development of Mountainous and Island Areas 2006; 1: 333-419	24.54627812	35.11961844		24.546	35.12
GREECE	Agios Pavlos	Nikopoulos D, Nikopoulou D, Papadopoulou K, Alexopoulos A. Pancratium maritimumEcosystems in Greece. Sustainable Management and Development of Mountainous and Island Areas 2006; 1: 333-348	24.56058970	35.10242646		24.561	35.102
GREECE	Agia Galini	Nikopoulos D, Nikopoulou D, Papadopoulou K, Alexopoulos A. Pancratium maritimumEcosystems in Greece. Sustainable Management and Development of Mountainous and Island Areas 2006; 1: 333-344	24.69514310	35.09747848		24.695	35.097
GREECE	Xerokampos	Nikopoulos D, Nikopoulou D, Papadopoulou K, Alexopoulos A. Pancratium maritimumEcosystems in Greece. Sustainable Management and Development of Mountainous and Island Areas 2006; 1: 333-423	26.23807395	35.04764131		26.238	35.048
GREECE	Kalamaki (Crete)	Imparato G pers. comm.	24.76	35.0278	AT	24.76	35.028
GREECE	Agia Fotia	Nikopoulos D, Nikopoulou D, Papadopoulou K, Alexopoulos A. Pancratium maritimumEcosystems in Greece. Sustainable Management and Development of Mountainous and Island Areas 2006; 1: 333-343	25.87564576	35.02176977		25.876	35.022
GREECE	Ferma	Nikopoulos D, Nikopoulou D, Papadopoulou K, Alexopoulos A. Pancratium maritimumEcosystems in Greece. Sustainable Management and Development of Mountainous and Island Areas 2006; 1: 333-366	25.85753756	35.01830526		25.858	35.018
GREECE	Graligia	Nikopoulos D, Nikopoulou D, Papadopoulou K, Alexopoulos A. Pancratium maritimumEcosystems in Greece. Sustainable Management and Development of Mountainous and Island Areas 2006; 1: 333-374	25.69154769	35.01446309		25.692	35.014
GREECE	Ierapetra	Nikopoulos D, Nikopoulou D, Papadopoulou K, Alexopoulos A. Pancratium maritimumEcosystems in Greece. Sustainable Management and Development of Mountainous and Island Areas 2006; 1: 333-376	25.74682335	35.01002134		25.747	35.01
GREECE	Koutsounari	Nikopoulos D, Nikopoulou D, Papadopoulou K, Alexopoulos A. Pancratium maritimumEcosystems in Greece. Sustainable Management and Development of Mountainous and Island Areas 2006; 1: 333-385	25.83495935	35.00983176		25.835	35.01
GREECE	Gaidouronisi	Nikopoulos D, Nikopoulou D, Papadopoulou K, Alexopoulos A. Pancratium maritimumEcosystems in Greece. Sustainable Management and Development of Mountainous and Island Areas 2006; 1: 333-370	25.70003938	34.87678512		25.7	34.877
ISRAEL	Tel-Aviv	Eisikowitch D, Galila J. Effect of Wind on the Pollination of Pancratium maritimum L. (Amaryllidaceae) by Hawkmoths (Lepidoptera: Sphingidae). Journal of Animal Ecology 1971; 40(3): 673-678.	0.69961111	40.80106944		0.7	40.801
ISRAEL	Tantura	Herbarium RBGE	34.91772644	32.60297971		34.918	32.603
ISRAEL	Herzliya	Imparato G pers. comm.	34.79949444	32.17035833	K	34.799	32.17
ISRAEL	Spiaggia di Nitzanim	Leschner H pers. comm.	34.60201389	31.74670000		34.602	31.747
ITALY	Eraclea a Mare	Menale B pers. comm.	12.76462832	45.54428206	ER	12.765	45.544
ITALY	Albarella	Menale B pers. comm.	12.30326667	45.27650556	VV	12.303	45.277
ITALY	Ca' Roman	Menale B pers. comm.	12.29391667	45.23879444	VN	12.294	45.239
ITALY	Abissola Marina	Herbarium PAL	8.51932397	44.32989866		8.519	44.33
ITALY	Varigotti	Grassi F, Cazzaniga E, Minuto L, Peccennini S, Barberis G, Basso B. Evaluation of biodiversity and conservation strategies in Pancratium maritimum L. for the Northern Tyrrhenian Sea. Biodiversity and Conservation 2005; 14(9): 2159-2177	8.40073590	44.18126344		8.401	44.181
ITALY	Finale Ligure	Grassi F, Cazzaniga E, Minuto L, Peccennini S, Barberis G, Basso B. Evaluation of biodiversity and conservation strategies in Pancratium maritimum L. for the Northern Tyrrhenian Sea. Biodiversity and Conservation 2005; 14(9): 2159-2173	8.34116150	44.16696287		8.341	44.167
ITALY	Albenga	Grassi F, Cazzaniga E, Minuto L, Peccennini S, Barberis G, Basso B. Evaluation of biodiversity and conservation strategies in Pancratium maritimum L. for the Northern Tyrrhenian Sea. Biodiversity and Conservation 2005; 14(9): 2159-2171	8.21119928	44.03634280		8.211	44.036
ITALY	Viareggio	Herbarium PAL	10.24780615	43.84276434		10.248	43.843
ITALY	Marina di Vecchiano	Peruzzi L pers. comm.	10.26539182	43.79462342		10.265	43.795
ITALY	San Rossore III	Peruzzi L pers. comm.	10.26959864	43.77573839		10.27	43.776
ITALY	San Rossore II	Peruzzi L pers. comm.	10.27037365	43.77250807		10.27	43.773
ITALY	Il Gombo	Peruzzi L pers. comm.	10.27782048	43.71670482		10.278	43.717
ITALY	San Rossore	Sani A. pers. comm.	10.28195677	43.69838989		10.282	43.698
ITALY	Calambrone	Ente Parco Regionale di Migliarino	10.29125202	43.59955026	CP	10.291	43.6
ITALY	Calambrone II	Peruzzi L pers. comm.	10.29387297	43.59157184		10.294	43.592
ITALY	Spiagge bianche	Peruzzi L pers. comm.	10.43741363	43.37908529		10.437	43.379
ITALY	Bibbona	Peruzzi L pers. comm.	10.53346106	43.21153756		10.533	43.212
ITALY	Castagneto Carducci	Balestri E, Cinelli F. Germination and Early-Seedling Establishment Capacity of Pancratium maritimum L. (Amaryllidaceae) on Coastal Dunes in the North-Western Mediterranean. Journal of Coastal Research 2004; 20(3): 761-770	10.53664268	43.19304409		10.537	43.193
ITALY	Rimigliano	Peruzzi L pers. comm.	10.52999606	43.04497043		10.53	43.045
ITALY	Lido Perelli	GBIF (www.gbif.org)	10.62575000	42.95448000		10.626	42.954
ITALY	Torre del Sale	Peruzzi L pers. comm.	10.60038052	42.95424791		10.6	42.954
ITALY	Piombino	Peruzzi L pers. comm.	10.56910005	42.95202891		10.569	42.952
ITALY	Capanna Civinini	anArchive (www.anarchive.it)	10.77252300	42.83055500		10.773	42.831
ITALY	Punta Ala	Grassi F, Cazzaniga E, Minuto L, Peccennini S, Barberis G, Basso B. Evaluation of biodiversity and conservation strategies in Pancratium maritimum L. for the Northern Tyrrhenian Sea. Biodiversity and Conservation 2005; 14(9): 2159-2175	10.73258160	42.80324580		10.733	42.803
ITALY	Foce del Tonfone	anArchive (www.anarchive.it)	10.82272321	42.77302348		10.823	42.773
ITALY	Riva del Sole	anArchive (www.anarchive.it)	10.85304076	42.76787048		10.853	42.768
ITALY	Lacona	Peruzzi L pers. comm.	10.30453988	42.76012167		10.305	42.76
ITALY	Giulianova	GBIF (www.gbif.org)	13.96924570	42.75635023		13.969	42.756
ITALY	Foce dell'Ombrone	anArchive (www.anarchive.it)	11.00404800	42.67692900		11.004	42.677
ITALY	Roseto degli Abruzzi	anArchive (www.anarchive.it)	14.02046704	42.67368797		14.02	42.674
ITALY	Marina di Alberese	anArchive (www.anarchive.it)	11.04302597	42.64610440		11.043	42.646
ITALY	Costa Maremma	anArchive (www.anarchive.it)	11.05068400	42.64366900		11.051	42.644
ITALY	Uccellina	Peruzzi L pers. comm.	11.06646227	42.63823477		11.066	42.638
ITALY	Pineto II	anArchive (www.anarchive.it)	14.05377200	42.63003000		14.054	42.63
ITALY	Pineto	Di Maio A pers. comm.	14.08942778	42.58493889	PS	14.089	42.585
ITALY	Burano	Peruzzi L pers. comm.	11.38228307	42.39601873		11.382	42.396
ITALY	Punta Faraglione	anArchive (www.anarchive.it)	10.86878998	42.36652981		10.869	42.367
ITALY	Campese	Peruzzi L pers. comm.	10.87933512	42.36595550		10.879	42.366
ITALY	Montalto	Peruzzi L pers. comm.	11.56164544	42.33600387		11.562	42.336
ITALY	Lido di Tarquinia	anArchive (www.anarchive.it)	11.70343600	42.22317900		11.703	42.223
ITALY	A.S. Tarquinia	anArchive (www.anarchive.it)	11.71099800	42.20719400		11.711	42.207
ITALY	Foce Osento	anArchive (www.anarchive.it)	14.60735100	42.20361900		14.607	42.204
ITALY	Punta Aderci	anArchive (www.anarchive.it)	14.70219129	42.17366419		14.702	42.174
ITALY	Marina di Vasto	anArchive (www.anarchive.it)	14.72088409	42.10134395		14.721	42.101
ITALY	Montereo di Bisaccia	De Rosa D pers. comm.	14.80664	42.056907		14.807	42.057
ITALY	Marina di Petacciato	anArchive (www.anarchive.it)	14.85856550	42.03452432		14.859	42.035
ITALY	Campo di Mare: Cerveteri	anArchive (www.anarchive.it)	12.03246100	41.97656300		12.032	41.977
ITALY	Campomarino	anArchive (www.anarchive.it)	15.05319503	41.96304541		15.053	41.963
ITALY	Torre Flavia	anArchive (www.anarchive.it)	12.04530800	41.96228700		12.045	41.962
ITALY	Zaiana	Innangi M pers. comm.	16.04095620	41.94566621		16.041	41.946
ITALY	Sfinale	Innangi M pers. comm.	16.09041965	41.93697598		16.09	41.937
ITALY	Ramitelli	anArchive (www.anarchive.it)	15.11234955	41.93147998		15.112	41.931
ITALY	Marina di San Nicola	anArchive (www.anarchive.it)	12.12644600	41.92593300		12.126	41.926
ITALY	Foce del Fortore	anArchive (www.anarchive.it)	15.28612966	41.91934368		15.286	41.919
ITALY	Dune di Varano	anArchive (www.anarchive.it)	15.75364177	41.91608237		15.754	41.916
ITALY	Lesina Marina	anArchive (www.anarchive.it)	15.32805020	41.91598088		15.328	41.916
ITALY	Marina di Palidoro	Imparato G pers. comm.	12.14366111	41.91367778	A	12.144	41.914
ITALY	Molinella, Gargano	Innangi M pers. comm.	16.15091081	41.90847046		16.151	41.908
ITALY	Duna di Lesina	anArchive (www.anarchive.it)	15.42045950	41.90059343		15.42	41.901
ITALY	Spiaggia San Lorenzo, Gargano	Innangi M pers. comm.	16.16003760	41.89295286		16.16	41.893
ITALY	Spiaggia di Vendicari	anArchive (www.anarchive.it)	16.17849936	41.84848518		16.178	41.848
ITALY	Macchiagrande	anArchive (www.anarchive.it)	12.20814000	41.82233900		12.208	41.822
ITALY	Castel Porziano	anArchive (www.anarchive.it)	12.37412450	41.68554050		12.374	41.686
ITALY	Foce Candelaro	anArchive (www.anarchive.it)	15.89414992	41.58426503		15.894	41.584
ITALY	Spiaggia del Cavaliere	anArchive (www.anarchive.it)	9.35825400	41.28643000		9.358	41.286
ITALY	Sabaudia	anArchive (www.anarchive.it)	13.01845550	41.28498211		13.018	41.285
ITALY	Spiaggia Rosa	anArchive (www.anarchive.it)	9.35604905	41.27926194		9.356	41.279
ITALY	Lo Strangolato	anArchive (www.anarchive.it)	9.40449900	41.25763600		9.404	41.258
ITALY	Stagno Torto	anArchive (www.anarchive.it)	9.41434600	41.25339100		9.414	41.253
ITALY	Punta Cannone	anArchive (www.anarchive.it)	9.40721800	41.25179400		9.407	41.252
ITALY	Baia Trinità	anArchive (www.anarchive.it)	9.39936400	41.24135700		9.399	41.241
ITALY	Cala d'Alga	anArchive (www.anarchive.it)	9.33926900	41.23310500		9.339	41.233
ITALY	Cala Francese	anArchive (www.anarchive.it)	9.37535300	41.22732600		9.375	41.227
ITALY	Foce del Garigliano	Croce A pers. comm.	13.76424634	41.22179012		13.764	41.222
ITALY	Spiaggia di Porto Puddu	anArchive (www.anarchive.it)	9.32146400	41.19156400		9.321	41.192
ITALY	Spiaggia del Liscia	anArchive (www.anarchive.it)	9.30525700	41.19024200		9.305	41.19
ITALY	Baia Domizia	De Rosa D pers. comm.	13.812419	41.185603		13.812	41.186
ITALY	Spiaggia Guidi	anArchive (www.anarchive.it)	9.46567400	41.18304000		9.466	41.183
ITALY	Rena Majore	anArchive (www.anarchive.it)	9.17001100	41.16960600		9.17	41.17
ITALY	Vignola	anArchive (www.anarchive.it)	9.05757700	41.12758500		9.058	41.128
ITALY	Mondragone	Croce A pers. comm.	13.88705765	41.10129120		13.887	41.101
ITALY	Cannigione	Di Maio A pers. comm.	9.56580000	41.09860000		9.566	41.099
ITALY	Arzachena	Di Maio A pers. comm.	9.5617	41.0892	B	9.56	41.09
ITALY	Variconi	anArchive (www.anarchive.it)	13.93462888	41.01607843		13.935	41.016
ITALY	Badesi	anArchive (www.anarchive.it)	8.85431100	40.97411600		8.854	40.974
ITALY	Spiaggia Le Bombarde	anArchive (www.anarchive.it)	8.20847300	40.96608700		8.208	40.966
ITALY	La Ciaccia	anArchive (www.anarchive.it)	8.78249600	40.91877500		8.782	40.919
ITALY	Costa del Sole	anArchive (www.anarchive.it)	9.56393200	40.91754800		9.564	40.918
ITALY	Saline di Stintino	anArchive (www.anarchive.it)	8.23294700	40.91032800		8.233	40.91
ITALY	Li Cuncheddi	anArchive (www.anarchive.it)	9.60615600	40.91006400		9.606	40.91
ITALY	Lu Bagnu	anArchive (www.anarchive.it)	8.68970900	40.90637900		8.69	40.906
ITALY	Le Vecchie Saline	Herbarium PAL	9.57691168	40.90305585		9.577	40.903
ITALY	Ezi Mannu	anArchive (www.anarchive.it)	8.26359400	40.87845200		8.264	40.878
ITALY	Stagno di Pilo	anArchive (www.anarchive.it)	8.28060900	40.86437200		8.281	40.864
ITALY	Cuma	Cepollaro L pers. comm.	14.04753056	40.84849444	I	14.048	40.848
ITALY	Marina di Sorso	Grassi F, Cazzaniga E, Minuto L, Peccennini S, Barberis G, Basso B. Evaluation of biodiversity and conservation strategies in Pancratium maritimum L. for the Northern Tyrrhenian Sea. Biodiversity and Conservation 2005; 14(9): 2159-2174	8.55366899	40.82910701		8.554	40.829
ITALY	Torregaveta	Croce A pers. comm.	14.04712952	40.81931241		14.047	40.819
ITALY	Platamona	De Rosa D pers. comm.	8.481346	40.819222		8.481	40.819
ITALY	Lido Morelli	anArchive (www.anarchive.it)	17.55311000	40.79980400		17.553	40.8
ITALY	Stagno di S. Teodoro	anArchive (www.anarchive.it)	9.66963500	40.79301300		9.67	40.793
ITALY	Torre Guaceto	anArchive (www.anarchive.it)	17.77676954	40.71936883		17.777	40.719
ITALY	Porto Ferro	anArchive (www.anarchive.it)	8.20543000	40.68534700		8.205	40.685
ITALY	Porticciolo	anArchive (www.anarchive.it)	8.18838200	40.64371400		8.188	40.644
ITALY	Siniscola	Grassi F, Cazzaniga E, Minuto L, Peccennini S, Barberis G, Basso B. Evaluation of biodiversity and conservation strategies in Pancratium maritimum L. for the Northern Tyrrhenian Sea. Biodiversity and Conservation 2005; 14(9): 2159-2176	9.75182789	40.59946369		9.752	40.599
ITALY	Litorale Maria Pia	anArchive (www.anarchive.it)	8.30765400	40.58450500		8.308	40.585
ITALY	Spiaggia Portonuovo	Innangi M pers. comm.	8.25841200	40.58428200	G	8.258	40.584
ITALY	Lido Lago	Izzo A pers. comm.	14.90765556	40.54731111		14.908	40.547
ITALY	Capo Comino	anArchive (www.anarchive.it)	9.80382800	40.53933000		9.804	40.539
ITALY	Marina di Chiatona	anArchive (www.anarchive.it)	17.05397200	40.51491000		17.054	40.515
ITALY	Marina di Palagiano	anArchive (www.anarchive.it)	17.04282900	40.51247000		17.043	40.512
ITALY	Foce Lenne	anArchive (www.anarchive.it)	17.01379900	40.50333400		17.014	40.503
ITALY	Foce Sele	Izzo A pers. comm.	14.93463333	40.49550278		14.935	40.496
ITALY	Spiaggia di Laura	anArchive (www.anarchive.it)	14.96754167	40.44820556		14.968	40.448
ITALY	Marina di Ginosa	anArchive (www.anarchive.it)	16.90212000	40.43570500		16.902	40.436
ITALY	Lago Salinella	anArchive (www.anarchive.it)	16.86771900	40.39925300		16.868	40.399
ITALY	Foce del Bradano	anArchive (www.anarchive.it)	16.85890800	40.38724000		16.859	40.387
ITALY	Le Cesine	Imparato G pers. comm.	18.34506667	40.35555833	Z	18.345	40.356
ITALY	Foce del Basento	anArchive (www.anarchive.it)	16.81815707	40.33865059		16.818	40.339
ITALY	Torre Specchia	anArchive (www.anarchive.it)	18.36936695	40.33415298		18.369	40.334
ITALY	Campomarino Salento	anArchive (www.anarchive.it)	17.57331600	40.29903100		17.573	40.299
ITALY	Porto Alabe	anArchive (www.anarchive.it)	8.47497500	40.24427700		8.475	40.244
ITALY	Foce Alento	Balestrieri R pers. comm.	15.14277800	40.16395400		15.143	40.164
ITALY	Foce del Sinni	anArchive (www.anarchive.it)	16.69124100	40.15267000		16.691	40.153
ITALY	Velia	Balestrieri R pers. comm.	15.15490200	40.15219600		15.155	40.152
ITALY	Marina di Ascea	Balestrieri R pers. comm.	15.17326900	40.13464500		15.173	40.135
ITALY	Baia Tirrena	Balestrieri R pers. comm.	15.17872807	40.12853707		15.179	40.129
ITALY	Punta Telegrafo	Balestrieri R pers. comm.	15.18041500	40.12596600		15.18	40.126
ITALY	Gallipoli	De Castro O pers. comm.	18.00928889	40.08258056	N	18.009	40.083
ITALY	Is Arenas	anArchive (www.anarchive.it)	8.48503500	40.07422200		8.485	40.074
ITALY	Policastro Bussentino	De Rosa D pers. comm.	15.515405	40.069600		15.515	40.07
ITALY	Saline di Palinuro	Russo I pers. comm.	15.28264016	40.05463059		15.283	40.055
ITALY	Palinuro	De Rosa D pers. comm.	15.284480	40.044885		15.284	40.045
ITALY	Oristano	De Castro O pers. comm.	8.39722222	40.04361111	SA	8.397	40.044
ITALY	Spiaggia di Marina di Camerota	Russo I pers. comm.	15.32384778	40.02575865		15.324	40.026
ITALY	Spiaggia di Marina di Camerota bis	De Rosa D pers. comm.	15.327084	40.022146		15.327	40.022
ITALY	Putzu Idu	Peruzzi L pers. comm.	8.41416384	40.01336835		8.414	40.013
ITALY	Torre della Suina	Ferraro S pers. comm.	18.01378333	40.00175000		18.014	40.002
ITALY	Spiaggia di Marina di Camerota (Lentiscelle)	Di Maio A pers. comm.	15.38282189	40.00061969	CT	15.383	40.001
ITALY	Isola Mal di Ventre	anArchive (www.anarchive.it)	8.30384800	39.98710800		8.304	39.987
ITALY	Torre S. Giovanni	Ferraro S pers. comm.	18.12125556	39.88406667		18.121	39.884
ITALY	Marina di Ugento	anArchive (www.anarchive.it)	18.13684700	39.87308200		18.137	39.873
ITALY	Torre Mozza	Ferraro S pers. comm.	18.16065278	39.85958889		18.161	39.86
ITALY	Lido Marini	Ferraro S pers. comm.	18.18110000	39.85051111		18.181	39.851
ITALY	Torre Pali	Ferraro S pers. comm.	18.20856944	39.83817222		18.209	39.838
ITALY	Pescoluse	Ferraro S pers. comm.	18.26129444	39.83626111		18.261	39.836
ITALY	Arborea	anArchive (www.anarchive.it)	8.54686400	39.80050700		8.547	39.801
ITALY	Scalea	Herbarium PAL	15.79168034	39.79388555		15.792	39.794
ITALY	Villapiana	Peruzzi L pers. comm.	16.48685366	39.77378101		16.487	39.774
ITALY	Millepini	Peruzzi L pers. comm.	16.48731086	39.76103593		16.487	39.761
ITALY	Marina di Sibari	Musacchio A pers. comm.	16.49385829	39.74785462	T	16.494	39.748
ITALY	Foce del Crati	anArchive (www.anarchive.it)	16.52463300	39.72664800		16.525	39.727
ITALY	Cirella	Herbarium PAL	15.80946437	39.72450541		15.809	39.725
ITALY	Torre dei Corsari	anArchive (www.anarchive.it)	8.45535600	39.69089900		8.455	39.691
ITALY	Schiavonea	Peruzzi L pers. comm.	16.55536652	39.64782818		16.555	39.648
ITALY	Marina di Arbus	anArchive (www.anarchive.it)	8.47134600	39.60105600		8.471	39.601
ITALY	Dune di Montevecchio	anArchive (www.anarchive.it)	8.46078000	39.56880800		8.461	39.569
ITALY	Rio Piscinas	Herbarium PAL	8.45119119	39.54385342		8.451	39.544
ITALY	Marina di Pietrapaola	Sibilio G pers. comm.	16.86113056	39.54446944	P	16.861	39.544
ITALY	Acqua Durci	anArchive (www.anarchive.it)	8.42661700	39.51204300		8.427	39.512
ITALY	Marina di Guardia Piemontese	anArchive (www.anarchive.it)	15.97794100	39.46360000		15.978	39.464
ITALY	Portixeddu	anArchive (www.anarchive.it)	8.41215500	39.44091200		8.412	39.441
ITALY	San Nicolao	anArchive (www.anarchive.it)	8.41234400	39.42362600		8.412	39.424
ITALY	Buggerru	anArchive (www.anarchive.it)	8.40265504	39.40430684		8.403	39.404
ITALY	Cala Domestica	anArchive (www.anarchive.it)	8.37979200	39.37434200		8.38	39.374
ITALY	Marina di Gonnesa	anArchive (www.anarchive.it)	8.42901900	39.27379200		8.429	39.274
ITALY	Costa Rei	De Rosa D pers. comm.	9.573689	39.249213		9.574	39.249
ITALY	Cagliari	Peruzzi L pers. comm.	9.21489211	39.22804271		9.215	39.228
ITALY	Foce del Neto	anArchive (www.anarchive.it)	17.14797141	39.20392149		17.148	39.204
ITALY	Capo Ferrato	anArchive (www.anarchive.it)	9.56260300	39.19058800		9.563	39.191
ITALY	Capo Carbonara	anArchive (www.anarchive.it)	9.50957100	39.12620800		9.51	39.126
ITALY	Villasimius	Fois S pers. comm.	9.52536111	39.12367778	D	9.525	39.124
ITALY	Cala dello Spalmatore	anArchive (www.anarchive.it)	8.25777100	39.11614700		8.258	39.116
ITALY	Spiaggia La Pelosa	anArchive (www.anarchive.it)	8.29924300	39.10102900		8.299	39.101
ITALY	Le Saline	anArchive (www.anarchive.it)	8.35981700	39.09754000		8.36	39.098
ITALY	Isola dei Cavoli	anArchive (www.anarchive.it)	9.53022000	39.08834300		9.53	39.088
ITALY	Pula	Fois G pers. comm.	9.02313197	39.00635689	SR	9.023	39.006
ITALY	Co Quaddus	anArchive (www.anarchive.it)	8.44172900	38.98008700		8.442	38.98
ITALY	Porto Pino	anArchive (www.anarchive.it)	8.58803800	38.96671600		8.588	38.967
ITALY	Cala Zafferano	anArchive (www.anarchive.it)	8.65368400	38.89824600		8.654	38.898
ITALY	Spiaggia di Chia	anArchive (www.anarchive.it)	8.87024000	38.88922500		8.87	38.889
ITALY	Marina di Pizzo	anArchive (www.anarchive.it)	16.16310000	38.73753200		16.163	38.738
ITALY	Nicotera	Peruzzi L pers. comm.	15.93087139	38.53473644		15.931	38.535
ITALY	Gioia Tauro	anArchive (www.anarchive.it)	15.87887900	38.42406400		15.879	38.424
ITALY	Vulcanello	anArchive (www.anarchive.it)	14.95775900	38.41826900		14.958	38.418
ITALY	Porto Ponente	anArchive (www.anarchive.it)	14.95248200	38.41803600		14.952	38.418
ITALY	Fumarole	anArchive (www.anarchive.it)	14.95474400	38.41794300		14.955	38.418
ITALY	Contrada Guarnacci	anArchive (www.anarchive.it)	15.57962500	38.28334500		15.58	38.283
ITALY	Sindaro Marino	anArchive (www.anarchive.it)	15.47166000	38.26592000		15.472	38.266
ITALY	Siderno	anArchive (www.anarchive.it)	16.28893200	38.26042000		16.289	38.26
ITALY	Villa S. Giovanni	anArchive (www.anarchive.it)	15.63382700	38.20384300		15.634	38.204
ITALY	Mondello	Herbarium PAL	13.32772184	38.20076489		13.328	38.201
ITALY	San Vito Lo Capo	GBIF (www.gbif.org)	12.73727000	38.17573000		12.737	38.176
ITALY	Trapani	Brullo S pers. comm.	12.53996389	38.03901111		12.54	38.039
ITALY	Cefalù	Grassi F, Cazzaniga E, Minuto L, Peccennini S, Barberis G, Basso B. Evaluation of biodiversity and conservation strategies in Pancratium maritimum L. for the Northern Tyrrhenian Sea. Biodiversity and Conservation 2005; 14(9): 2159-2172	14.01707526	38.03611523		14.017	38.036
ITALY	W Sicily, Trapani	Perrone R, Salmeri C, Brullo S, Colombo P, De Castro O. What do leaf anatomy and micro-morphology tell us about the psammophilous Pancratium maritimum L. (Amaryllidaceae) in response to sand dune conditions? Flora - Morphology, Distribution, Functional Ecology of Plants 2015; 213; 20-31	12.51641947	38.02048801		12.516	38.02
ITALY	Capo Playa	anArchive (www.anarchive.it)	13.91836800	38.01387700		13.918	38.014
ITALY	Brancaleone Marina	anArchive (www.anarchive.it)	16.10639100	37.96935100		16.106	37.969
ITALY	Isola Grande	anArchive (www.anarchive.it)	12.44623500	37.89808000		12.446	37.898
ITALY	Torrazza	Barbaro D pers. comm.	12.49213967	37.68903514		12.492	37.689
ITALY	Selinute	Sepe F pers. comm.	12.80291111	37.58139444	E	12.803	37.581
ITALY	Tre Fontane	anArchive (www.anarchive.it)	12.74015900	37.57354900		12.74	37.574
ITALY	Foce del Simeto	De Castro O pers. comm.	15.08972200	37.39783300	FS	15.09	37.398
ITALY	Torre Salsa	anArchive (www.anarchive.it)	13.35455100	37.35719200		13.355	37.357
ITALY	San Leonardo	anArchive (www.anarchive.it)	15.09100911	37.35357981		15.091	37.354
ITALY	San Leone	anArchive (www.anarchive.it)	13.60047339	37.25420919		13.6	37.254
ITALY	Torre di Gaffe	Herbarium PAL	13.83448806	37.13959959		13.834	37.14
ITALY	Santa Teresa Gallura	Herbarium PAL	25.27727301	37.13232541		25.277	37.132
ITALY	Manfria	anArchive (www.anarchive.it)	14.12931919	37.09944789		14.129	37.099
ITALY	Gela	Brullo S pers. comm.	14.24035000	37.06682778		14.24	37.067
ITALY	Avola	anArchive (www.anarchive.it)	15.14469619	36.89852439		15.145	36.899
ITALY	Cammarana - Scoglitti	anArchive (www.anarchive.it)	14.44567200	36.86753800		14.446	36.868
ITALY	Eloro	Peruzzi L pers. comm.	15.10674849	36.84016933		15.107	36.84
ITALY	Punta Braccetto	anArchive (www.anarchive.it)	14.46248100	36.81686400		14.462	36.817
ITALY	Torre di Mezzo	anArchive (www.anarchive.it)	14.48001600	36.80375800		14.48	36.804
ITALY	Spiaggia Due Mari	anArchive (www.anarchive.it)	15.09487700	36.80137900		15.095	36.801
ITALY	Vendicari	Vallariello R pers. comm.	15.10499167	36.79203611		15.105	36.792
ITALY	Caucana - Casuzze	anArchive (www.anarchive.it)	14.50612100	36.78787600		14.506	36.788
ITALY	Marina di Ragusa	anArchive (www.anarchive.it)	14.57050400	36.77982500		14.571	36.78
ITALY	Tarrhos	anArchive (www.anarchive.it)	34.85779278	36.77657635		34.858	36.777
ITALY	Foce dell'Irmino	anArchive (www.anarchive.it)	14.59569300	36.77329800		14.596	36.773
ITALY	Costa Reitani	anArchive (www.anarchive.it)	15.10371200	36.75610100		15.104	36.756
ITALY	Cava d'Aliga	anArchive (www.anarchive.it)	14.68514500	36.72787600		14.685	36.728
ITALY	Sampieri	Brullo S pers. comm.	14.73840833	36.72052778		14.738	36.721
ITALY	Costa di Carro	anArchive (www.anarchive.it)	14.71441000	36.72025200		14.714	36.72
ITALY	Marina di Modica	anArchive (www.anarchive.it)	14.78044000	36.70974800		14.78	36.71
ITALY	Marina della Marza	anArchive (www.anarchive.it)	14.94628600	36.70168100		14.946	36.702
ITALY	Punta Ciriga	anArchive (www.anarchive.it)	14.97238300	36.69228900		14.972	36.692
ITALY	Isola di Capo Passero	anArchive (www.anarchive.it)	15.14787393	36.68453067		15.148	36.685
ITALY	Spiaggia dell'Ambra	anArchive (www.anarchive.it)	15.04744200	36.68431300		15.047	36.684
ITALY	Capo delle Correnti	anArchive (www.anarchive.it)	15.07936100	36.64700300		15.079	36.647
ITALY	Monte Nero	anArchive (www.anarchive.it)	12.85557996	35.86544787		12.856	35.865
ITALY	Linosa Cala Pozzol.	Brullo S pers. comm.	12.85546389	35.86310833		12.855	35.863
ITALY	M. Calcarella	anArchive (www.anarchive.it)	12.87542224	35.85744400		12.875	35.857
ITALY	Arena Bianca	anArchive (www.anarchive.it)	12.85998355	35.85738820		12.86	35.857
ITALY	Lampione (Pelagie Arch.)	Perrone R, Salmeri C, Brullo S, Colombo P, De Castro O. What do leaf anatomy and micro-morphology tell us about the psammophilous Pancratium maritimum L. (Amaryllidaceae) in response to sand dune conditions? Flora - Morphology, Distribution, Functional Ecology of Plants 2015; 213; 20-31	12.33305600	35.55444400		12.333	35.554
ITALY	Lampedusa, Spiaggia dei Conigli	Perrone R, Salmeri C, Brullo S, Colombo P, De Castro O. What do leaf anatomy and micro-morphology tell us about the psammophilous Pancratium maritimum L. (Amaryllidaceae) in response to sand dune conditions? Flora - Morphology, Distribution, Functional Ecology of Plants 2015; 213; 20-31	12.55712900	35.51319500		12.557	35.513
ITALY	Tavolara (NE Sardinia)	Perrone R, Salmeri C, Brullo S, Colombo P, De Castro O. What do leaf anatomy and micro-morphology tell us about the psammophilous Pancratium maritimum L. (Amaryllidaceae) in response to sand dune conditions? Flora - Morphology, Distribution, Functional Ecology of Plants 2015; 213; 20-31	34.78038348	32.11485984		34.78	32.115
LEBANON	Arida	Zahreddine H, Clubbe C, Baalbaki R, Ghalayini A, Talhouk SN. Status of native species in threatened Mediterranean habitats: the case of Pancratium maritimum L. (sea daffodil) in Lebanon. Biological Conservation 2004; 120(1): 11-18	35.97747566	34.62851397		35.977	34.629
LEBANON	Palm Island	Zahreddine H, Clubbe C, Baalbaki R, Ghalayini A, Talhouk SN. Status of native species in threatened Mediterranean habitats: the case of Pancratium maritimum L. (sea daffodil) in Lebanon. Biological Conservation 2004; 120(1): 11-23	35.77602548	34.49311433		35.776	34.493
LEBANON	Tripoli	Zahreddine H, Clubbe C, Baalbaki R, Ghalayini A, Talhouk SN. Status of native species in threatened Mediterranean habitats: the case of Pancratium maritimum L. (sea daffodil) in Lebanon. Biological Conservation 2004; 120(1): 11-25	35.81394861	34.44402896		35.814	34.444
LEBANON	Enfeh	Zahreddine H, Clubbe C, Baalbaki R, Ghalayini A, Talhouk SN. Status of native species in threatened Mediterranean habitats: the case of Pancratium maritimum L. (sea daffodil) in Lebanon. Biological Conservation 2004; 120(1): 11-19	35.72938763	34.34800330		35.729	34.348
LEBANON	Jbail	Zahreddine H, Clubbe C, Baalbaki R, Ghalayini A, Talhouk SN. Status of native species in threatened Mediterranean habitats: the case of Pancratium maritimum L. (sea daffodil) in Lebanon. Biological Conservation 2004; 120(1): 11-20	35.64888280	34.11385673		35.649	34.114
LEBANON	Khalde	Zahreddine H, Clubbe C, Baalbaki R, Ghalayini A, Talhouk SN. Status of native species in threatened Mediterranean habitats: the case of Pancratium maritimum L. (sea daffodil) in Lebanon. Biological Conservation 2004; 120(1): 11-22	35.47751743	33.78931006		35.478	33.789
LEBANON	Jieh	Zahreddine H, Clubbe C, Baalbaki R, Ghalayini A, Talhouk SN. Status of native species in threatened Mediterranean habitats: the case of Pancratium maritimum L. (sea daffodil) in Lebanon. Biological Conservation 2004; 120(1): 11-21	35.41795247	33.66833227		35.418	33.668
LEBANON	Saida	Zahreddine H, Clubbe C, Baalbaki R, Ghalayini A, Talhouk SN. Status of native species in threatened Mediterranean habitats: the case of Pancratium maritimum L. (sea daffodil) in Lebanon. Biological Conservation 2004; 120(1): 11-24	35.37593400	33.56819292		35.376	33.568
LEBANON	Coast nature	Dönmez AA pers. comm.	35.19213333	33.27507500		35.192	33.275
LEBANON	Tyr	Zahreddine H, Clubbe C, Baalbaki R, Ghalayini A, Talhouk SN. Status of native species in threatened Mediterranean habitats: the case of Pancratium maritimum L. (sea daffodil) in Lebanon. Biological Conservation 2004; 120(1): 11-26	35.20961402	33.27510811		35.21	33.275
LIBIA	Kouf National Park	Di Maio A pers. comm.	22.64527778	32.77305556		22.645	32.773
LIBIA	Damah	Véla E pers. comm.	21.35141389	32.77332778	L	21.351	32.773
MALTA	Mellieha	Imparato G pers. comm.	14.36167500	35.99150000	O	14.362	35.992
MALTA	Costa nord	Brullo S pers. comm.	14.33102778	35.98714444		14.331	35.987
MALTA	Malta, Paradise Bay	Perrone R, Salmeri C, Brullo S, Colombo P, De Castro O. What do leaf anatomy and micro-morphology tell us about the psammophilous Pancratium maritimum L. (Amaryllidaceae) in response to sand dune conditions? Flora - Morphology, Distribution, Functional Ecology of Plants 2015; 213; 20-31	14.33235300	35.98183700		14.332	35.982
MOROCCO	Kenitra	Vallariello G pers. comm.	-6.67938056	34.25697222	MA	-6.679	34.257
MOROCCO	Bouknadel	Vallariello G pers. comm.	-6.73890329	34.14691495	MB	-6.739	34.147
MOROCCO	Mohammedia	Vallariello G pers. comm.	-7.41491389	33.69996389	Q	-7.415	33.7
PORTUGAL	Playa de Quiaios	GBIF (www.gbif.org)	-8.88392089	40.07329274		-8.884	40.073
PORTUGAL	Almada	Imparato G pers. comm.	-9.24975278	38.65595000	J	-9.25	38.656
PORTUGAL	Comporta	GBIF (www.gbif.org)	-8.79244087	38.35352669		-8.792	38.354
PORTUGAL	Ilha de Tavira, Ostteil	GBIF (www.gbif.org)	-7.62520000	37.11077000		-7.625	37.111
PORTUGAL	Praia da Carvalha	GBIF (www.gbif.org)	-8.71964255	37.08618169		-8.72	37.086
PORTUGAL	Cabo de Sao Vicente	GBIF (www.gbif.org)	-8.97913524	37.04431479		-8.979	37.044
PORTUGAL	Lagoa do Martinhal	GBIF (www.gbif.org)	-8.92778000	37.01893000		-8.928	37.019
PORTUGAL	Albufeira	GBIF (www.gbif.org)	29.82279417	31.13695236		29.823	31.137
SPAIN	Playa de Verdicio	GBIF (www.gbif.org)	-5.87650696	43.62683481		-5.877	43.627
SPAIN	El Espartal	GBIF (www.gbif.org)	-5.94482000	43.58532000		-5.945	43.585
SPAIN	La Coruña	Grassi F, Cazzaniga E, Minuto L, Peccennini S, Barberis G, Basso B. Evaluation of biodiversity and conservation strategies in Pancratium maritimum L. for the Northern Tyrrhenian Sea. Biodiversity and Conservation 2005; 14(9): 2159-2178	-8.40636192	43.36973696		-8.406	43.37
SPAIN	Zaruz	GBIF (www.gbif.org)	-2.15600000	43.29100000		-2.156	43.291
SPAIN	Corrubedo	Medrano M, Guitán P, Guitán J. Patterns of fruit and seed set within inflorescences of Pancratium maritimum (Amaryllidaceae): nonuniform pollination, resource limitation, or architectural effects? American Journal of Botany 2000; 87(4): 493-501	-9.04289620	42.56991429		-9.043	42.57
SPAIN	Xidoiro Areoso	GBIF (www.gbif.org)	-8.90001750	42.54103499		-8.9	42.541
SPAIN	Vionta	GBIF (www.gbif.org)	-9.00552446	42.49705734		-9.006	42.497
SPAIN	Pontevedra	Imparato G pers. comm.	-8.67339167	42.42087500	W	-8.673	42.421
SPAIN	Riumar	GBIF (www.gbif.org)	0.84834252	40.73049898		0.848	40.73
SPAIN	El Pebret	GBIF (www.gbif.org)	0.35257000	40.30454000		0.353	40.305
SPAIN	Minorca	Fraga P pers. comm.	4.05452733	40.05359831	BE	4.055	40.054
SPAIN	Cala Tirrant	GBIF (www.gbif.org)	4.10419000	40.04416000		4.104	40.044
SPAIN	Cala Trebaluger	GBIF (www.gbif.org)	3.98887774	39.93139853		3.989	39.931
SPAIN	Tarragona	Imparato G pers. comm.	8.44126400	39.87944500	KA	8.441	39.879
SPAIN	Canal de Siurana	GBIF (www.gbif.org)	3.12101439	39.80169257		3.121	39.802
SPAIN	Es Comu de Muro	Mir-Gual M, Pons GX. Coast sandy strip fragmentation of a protected zone in the N of Mallorca, Spain (Western Mediterranean). Journal of Coastal Research 2011; 64: 1367-1371	3.13711258	39.78037209		3.137	39.78
SPAIN	Can Picafort	GBIF (www.gbif.org)	3.14680805	39.77224970		3.147	39.772
SPAIN	Xilxes	GBIF (www.gbif.org)	-0.15650301	39.76409280		-0.157	39.764
SPAIN	Son Real	GBIF (www.gbif.org)	3.19342000	39.74970000		3.193	39.75
SPAIN	Son Serra de Marina	GBIF (www.gbif.org)	3.22826000	39.73577000		3.228	39.736
SPAIN	El Puig	GBIF (www.gbif.org)	-0.27254163	39.58316846		-0.273	39.583
SPAIN	Es Trenc	GBIF (www.gbif.org)	2.98571000	39.34279000		2.986	39.343
SPAIN	Sant Jordi	GBIF (www.gbif.org)	2.98721417	39.31967465		2.987	39.32
SPAIN	Platja es Dolc	GBIF (www.gbif.org)	3.00450000	39.31637000		3.005	39.316
SPAIN	Playa Azul	GBIF (www.gbif.org)	-0.29324355	39.30988831		-0.293	39.31
SPAIN	Platja des Caragol	GBIF (www.gbif.org)	3.04321000	39.27891000		3.043	39.279
SPAIN	Tancat de l'Estell	GBIF (www.gbif.org)	-0.24574470	39.22682703		-0.246	39.227
SPAIN	Cabrera	GBIF (www.gbif.org)	2.93786000	39.14587000		2.938	39.146
SPAIN	Vivers de les Marjals	GBIF (www.gbif.org)	-0.18485213	39.03536183		-0.185	39.035
SPAIN	Playa Santa Ana	GBIF (www.gbif.org)	-0.03028000	38.88096000		-0.03	38.881
SPAIN	El Palmar	GBIF (www.gbif.org)	0.04451499	38.86022567		0.045	38.86
SPAIN	Playa de Levante	GBIF (www.gbif.org)	-0.06139491	38.58307349		-0.061	38.583
SPAIN	Playa de Santa Pola	GBIF (www.gbif.org)	-0.51340437	38.23423345		-0.513	38.234
SPAIN	La Marina	GBIF (www.gbif.org)	-0.63453832	38.14322276		-0.635	38.143
SPAIN	Campomar	GBIF (www.gbif.org)	-0.65062068	38.05751751		-0.651	38.058
SPAIN	Torrevieja	GBIF (www.gbif.org)	-0.66840240	37.97719975		-0.668	37.977
SPAIN	Pueblo Latino	GBIF (www.gbif.org)	-0.75340602	37.87875030		-0.753	37.879
SPAIN	Huelva	Imparato G pers. comm.	-7.05001667	37.20856389	S	-7.05	37.209
SPAIN	Punta Umbria	GBIF (www.gbif.org)	-6.99144987	37.18785104		-6.991	37.188
SPAIN	Almeria	Imparato G pers. comm.	-2.45580278	36.82930556	R	-2.456	36.829
SPAIN	Malaga	Imparato G pers. comm.	-4.40437778	36.71973333	SM	-4.404	36.72
SPAIN	Rincòn de la Victoria	GBIF (www.gbif.org)	-4.28441532	36.71454972		-4.284	36.715
SPAIN	Cadiz	GBIF (www.gbif.org)	-6.28416852	36.51405307		-6.284	36.514
SPAIN	Malaga II	Imparato G pers. comm.	-5.03874484	36.45997853		-5.039	36.46
SPAIN	Palmones	Herbarium RBGE	-5.43238777	36.17179031		-5.432	36.172
SPAIN	Corralejo	GBIF (www.gbif.org)	-13.84640299	28.72610806		-13.846	28.726
SPAIN	Faro de Toston	Santos A, Fernández M. Notas Florísticas de las Islas de Lanzarote y Fuertaventura (I. Canarias). Anales Jardín Botánico de Madrid 1984; 41(1): 167-174	-14.01130200	28.71118700		-14.011	28.711
TUNISIA	Galite	Sanaa A, Fadhel NB. Genetic diversity in mainland and island populations of the endangered Pancratium maritimum L. (Amaryllidaceae) in Tunisia. Scientia Horticulturae 125; 4: 740-753	8.92463626	37.51881579		8.925	37.519
TUNISIA	Bizerte	Sanaa A, Boulila A, Boussaid M, Fadhel NB. Alginic acid and derivatives, new polymers from the endangered Pancratium maritimum L. Industrial Crops and Products 2013; 44: 290-293	9.87491709	37.28779815		9.875	37.288
TUNISIA	Jarzouna	Sanaa A, Fadhel NB. Genetic diversity in mainland and island populations of the endangered Pancratium maritimum L. (Amaryllidaceae) in Tunisia. Scientia Horticulturae 125; 4: 740-754	9.94205712	37.25117641		9.942	37.251
TUNISIA	Cap Serrat	Sanaa A, Fadhel NB. Genetic diversity in mainland and island populations of the endangered Pancratium maritimum L. (Amaryllidaceae) in Tunisia. Scientia Horticulturae 125; 4: 740-748	9.24124503	37.21565400		9.241	37.216
TUNISIA	Zembra	Sanaa A, Fadhel NB. Genetic diversity in mainland and island populations of the endangered Pancratium maritimum L. (Amaryllidaceae) in Tunisia. Scientia Horticulturae 125; 4: 740-764	10.80991510	37.11893095		10.81	37.119
TUNISIA	Sidi Alì el Mekki	Sanaa A, Fadhel NB. Genetic diversity in mainland and island populations of the endangered Pancratium maritimum L. (Amaryllidaceae) in Tunisia. Scientia Horticulturae 125; 4: 740-760	10.19598345	37.09518883		10.196	37.095
TUNISIA	Sidi Daoued	Sanaa A, Fadhel NB. Genetic diversity in mainland and island populations of the endangered Pancratium maritimum L. (Amaryllidaceae) in Tunisia. Scientia Horticulturae 125; 4: 740-761	11.00452073	37.06176831		11.005	37.062
TUNISIA	Dar Allouch	Sanaa A, Fadhel NB. Genetic diversity in mainland and island populations of the endangered Pancratium maritimum L. (Amaryllidaceae) in Tunisia. Scientia Horticulturae 125; 4: 740-751	11.07405906	36.98608600		11.074	36.986
TUNISIA	Tabarka	Sanaa A, Fadhel NB. Genetic diversity in mainland and island populations of the endangered Pancratium maritimum L. (Amaryllidaceae) in Tunisia. Scientia Horticulturae 125; 4: 740-762	8.74989722	36.96116389		8.75	36.961
TUNISIA	La Marsa	Maiorino E pers. comm.	10.33108056	36.88683611	TM	10.331	36.887
TUNISIA	Oued Laabid	Sanaa A, Fadhel NB. Genetic diversity in mainland and island populations of the endangered Pancratium maritimum L. (Amaryllidaceae) in Tunisia. Scientia Horticulturae 125; 4: 740-759	10.61010000	36.87184444		10.61	36.872
TUNISIA	Borj Sedria	Sanaa A, Fadhel NB. Genetic diversity in mainland and island populations of the endangered Pancratium maritimum L. (Amaryllidaceae) in Tunisia. Scientia Horticulturae 125; 4: 740-747	10.34681846	36.72946571		10.347	36.729
TUNISIA	Chott Ezzouhour	Sanaa A, Fadhel NB. Genetic diversity in mainland and island populations of the endangered Pancratium maritimum L. (Amaryllidaceae) in Tunisia. Scientia Horticulturae 125; 4: 740-750	10.93626110	36.67728673		10.936	36.677
TUNISIA	Kuriat	Sanaa A, Fadhel NB. Genetic diversity in mainland and island populations of the endangered Pancratium maritimum L. (Amaryllidaceae) in Tunisia. Scientia Horticulturae 125; 4: 740-756	11.01062452	35.76805205		11.011	35.768
TUNISIA	Monastir	Sanaa A, Fadhel NB. Genetic diversity in mainland and island populations of the endangered Pancratium maritimum L. (Amaryllidaceae) in Tunisia. Scientia Horticulturae 125; 4: 740-758	10.81775492	35.71728715		10.818	35.717
TUNISIA	Mahdia	Sanaa A, Fadhel NB. Genetic diversity in mainland and island populations of the endangered Pancratium maritimum L. (Amaryllidaceae) in Tunisia. Scientia Horticulturae 125; 4: 740-757	11.05025278	35.51341389		11.05	35.513
TUNISIA	Karkennah	Sanaa A, Fadhel NB. Genetic diversity in mainland and island populations of the endangered Pancratium maritimum L. (Amaryllidaceae) in Tunisia. Scientia Horticulturae 125; 4: 740-755	11.13846667	34.70104722		11.138	34.701
TUNISIA	Chaffar	Sanaa A, Fadhel NB. Genetic diversity in mainland and island populations of the endangered Pancratium maritimum L. (Amaryllidaceae) in Tunisia. Scientia Horticulturae 125; 4: 740-749	10.56088611	34.52515833		10.561	34.525
TUNISIA	Djerba	Sanaa A, Fadhel NB. Genetic diversity in mainland and island populations of the endangered Pancratium maritimum L. (Amaryllidaceae) in Tunisia. Scientia Horticulturae 125; 4: 740-752	11.03776001	33.77306357		11.038	33.773
TUNISIA	Zarzis	Sanaa A, Fadhel NB. Genetic diversity in mainland and island populations of the endangered Pancratium maritimum L. (Amaryllidaceae) in Tunisia. Scientia Horticulturae 125; 4: 740-763	11.08102675	33.58986690		11.081	33.59
TURKEY	Samsun	Herbarium RBGE	36.25211412	41.34711750		36.252	41.347
TURKEY	Karasu (Sakarya)	Iovinella M pers. comm.	30.70920278	41.10483611	KR	30.709	41.105
TURKEY	Kocaeli	Dönmez AA pers. comm.	30.96303611	41.07249167		30.963	41.072
TURKEY	Giresun	Herbarium RBGE	38.43211389	40.91262523		38.432	40.913
TURKEY	Tarsus Delta	GBIF (www.gbif.org)	26.48930536	38.97663691		26.489	38.977
TURKEY	Side (Antalya)	Dönmez AA pers. comm.	31.38985833	36.76570833		31.39	36.766
TURKEY	Karatas	Herbarium RBGE	35.46098512	36.59143496		35.461	36.591
TURKEY	Alanya	Herbarium RBGE	31.98521161	36.54427929		31.985	36.544
TURKEY	Samandağ (Antalya)	Dönmez AA pers. comm.	35.94843333	36.07553889		35.948	36.076
UNITED KINGDOM	Slapton	GBIF (www.gbif.org)	-3.63851983	50.29628865		-3.639	50.296

## Sheet: Sheet 2
Title: A multi-faceted approach to analyse the effects of environmental variables on geographic range and genetic structure of a perennial psammophilous geophyte: the case of the sea daffodil Pancratium maritimum L. in the Mediterranean basin.
Authors: O. De Castro, A. Di Maio, M. Di Febbraro, G. Imparato, M. Innangi, E. Vela, B. Menale
S2 File. Sheet 2: The relative contribution to the models and related response curves of each environmental predictor.
